# Supplementary material for: When Online Lending Meets Real Estate: Examining Investment Decisions in Lending-Based Real Estate Crowdfunding
Source: Atypon-hosted journal article supplement (doi:10.1287/isre.2019.0909), 2020-06-12
Supplement: isre.2019.0909.sm1.pdf [file isre.2019.0909.sm1.pdf]

Online Supplement to

# When Online Lending Meets Real Estate: Examining Investment Decisions in Lending-Based Real Estate Crowdfunding

**Figure A1. An Example of Listing Page**

| Title                                                                                                           | Amount    | Rate ↕ | Term ↕    | % Funded ↕                                                                          | Invest                                     |
|-----------------------------------------------------------------------------------------------------------------|-----------|--------|-----------|-------------------------------------------------------------------------------------|--------------------------------------------|
|  Mr. Xiang<br>Borrow \$ 20,000 | \$ 20,000 | 10.00% | 6 months  |  | <b>Invest now</b><br>Post date: 2015-01-07 |
|  Mr. Zhan<br>Borrow \$ 11,000  | \$ 11,000 | 10.00% | 6 months  |  | <b>Finished</b><br>Post date: 2015-01-06   |
|  Mrs. Liu<br>Borrow \$ 35,000  | \$ 35,000 | 10.00% | 36 months |  | <b>Finished</b><br>Post date: 2015-01-06   |
|  Mrs. Zhou<br>Borrow \$ 16,000 | \$ 16,000 | 10.00% | 6 months  |  | <b>Finished</b><br>Post date: 2015-01-06   |
|  Mr. Liu<br>Borrow \$ 23,000   | \$ 23,000 | 15.00% | 6 months  |  | <b>Finished</b><br>Post date: 2015-01-05   |

**Figure A2. An Example of Loan Page**

Home page > Listings > Project profile

Borrow \$ 200,000

|                            |                       |                           |                                                                                               |
|----------------------------|-----------------------|---------------------------|-----------------------------------------------------------------------------------------------|
| Amount<br><b>\$200,000</b> | Rate<br><b>10.00%</b> | Term<br><b>6 months</b>   | Amount left: \$ 136,000<br><input type="text" value="\$ 0"/> <b>Fill</b><br><b>Invest now</b> |
| Loan ID: 2015*****         | Post Date: 2015-01-07 | Purpose: Home Improvement |                                                                                               |

% Funded  32%

**24**

Description **Transaction records**

Borrower information

Verification

Risk control

**Collateral Information**

Investigation: Pass field investigation, personal information verified, all information is true

The type of collateral: The borrower's owned house. Location: Yihuan Street, Wuhou District, Chengdu. Purchased in 2005. 71 square foot. Good transport facilities. Evaluated value: \$100,000

Repayment source: Operating income

Conclusion: The borrower has a stable residence and a stable income

**Figure A3. Distribution of Propensity Score Before and After Kernel Matching**

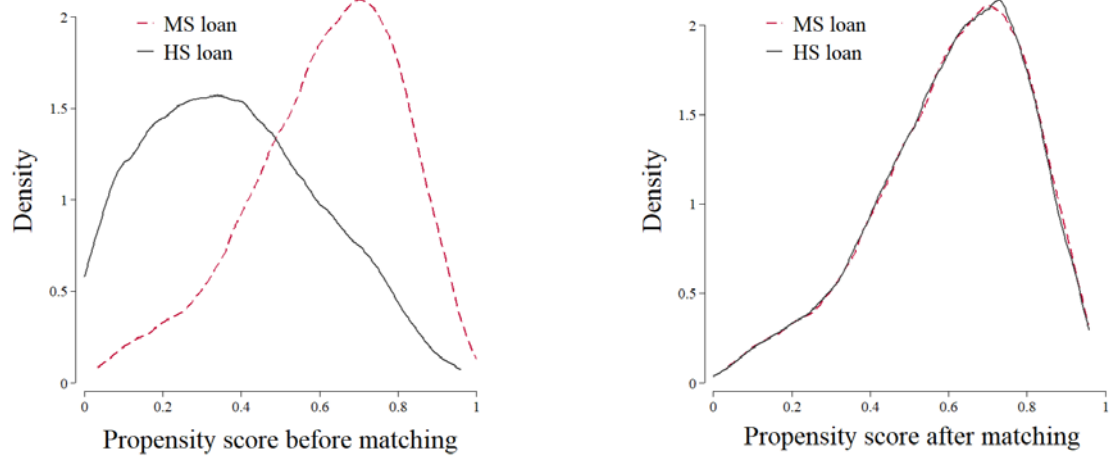

**Table A1. Sensitivity to Fundraising performance for Time-to-invest Analysis**

| <i>Percent Funded</i>         | <b>&lt;=25%</b> |            | <b>25%~50%</b> |            | <b>50%~75%</b> |          | <b>&gt;75%</b> |            |
|-------------------------------|-----------------|------------|----------------|------------|----------------|----------|----------------|------------|
|                               | (1)             |            | (2)            |            | (3)            |          | (4)            |            |
| <i>Collateral type(1=MS)</i>  | 0.399***        | (0.050)    | 0.419***       | (0.052)    | 0.504***       | (0.055)  | 0.485***       | (0.056)    |
| <i>log Loan amount</i>        | 0.781***        | (0.034)    | 0.597***       | (0.025)    | 0.607***       | (0.027)  | 0.571***       | (0.018)    |
| <i>log Loan rate</i>          | 234.824***      | (99.107)   | 246.410***     | (124.073)  | 20.957***      | (11.199) | 375.570***     | (176.429)  |
| <i>log Loan duration</i>      | 0.628***        | (0.055)    | 0.897          | (0.110)    | 1.415**        | (0.191)  | 0.904          | (0.109)    |
| <i>Age</i>                    | 0.999           | (0.002)    | 1.000          | (0.002)    | 1.001          | (0.002)  | 0.999          | (0.002)    |
| <i>Gender</i>                 | 1.194***        | (0.051)    | 1.036          | (0.039)    | 1.021          | (0.033)  | 0.961          | (0.027)    |
| <i>Education</i>              | 1.305***        | (0.046)    | 1.160***       | (0.037)    | 1.187***       | (0.045)  | 1.158***       | (0.037)    |
| <i>Marital status</i>         | 0.869***        | (0.036)    | 0.915*         | (0.047)    | 1.019          | (0.033)  | 1.019          | (0.031)    |
| <i>Monthly income</i>         | 0.729***        | (0.031)    | 0.979          | (0.030)    | 1.071**        | (0.030)  | 1.072**        | (0.037)    |
| <i>Employment</i>             | 1.014           | (0.056)    | 1.029          | (0.048)    | 0.954          | (0.050)  | 0.883***       | (0.035)    |
| <i>Co-borrower</i>            | 1.302***        | (0.076)    | 1.256***       | (0.097)    | 1.179**        | (0.090)  | 1.140**        | (0.076)    |
| <i>Repeat borrower</i>        | 0.778***        | (0.059)    | 1.218***       | (0.091)    | 1.142          | (0.105)  | 0.859          | (0.083)    |
| <i>Years of purchase</i>      | 1.036***        | (0.006)    | 1.019***       | (0.007)    | 0.978***       | (0.005)  | 0.987**        | (0.005)    |
| <i>log Gross area</i>         | 1.472***        | (0.087)    | 1.723***       | (0.089)    | 1.246***       | (0.064)  | 1.196***       | (0.071)    |
| <i>log Estimated value</i>    | 0.738***        | (0.033)    | 0.859***       | (0.043)    | 0.952          | (0.046)  | 1.109**        | (0.045)    |
| <i>Percent funded</i>         | 0.001***        | (0.000)    | 0.003**        | -0.008     | 2.6E+04**      | -1.3E+05 | 0.001***       | (0.000)    |
| <i>Sq Percent funded</i>      | 3.6E+10***      | (-1.3E+11) | 3.6E+02*       | (-1.2E+03) | 1.0E-03**      | (0.000)  | 1.5E+06***     | (-3.8E+06) |
| <i>EXP</i>                    | 1.329***        | (0.053)    | 1.326***       | (0.059)    | 1.493***       | (0.076)  | 1.523***       | (0.079)    |
| <i>ΔHPI</i>                   | 1.700***        | (0.210)    | 2.231***       | (0.173)    | 1.453***       | (0.159)  | 1.632***       | (0.171)    |
| <i>SMR</i>                    | 1.002           | (0.005)    | 1.006          | (0.004)    | 0.980***       | (0.004)  | 0.997          | (0.004)    |
| <i>SMV</i>                    | 0.924***        | (0.010)    | 0.890***       | (0.011)    | 0.878***       | (0.012)  | 0.927***       | (0.015)    |
| <i>Collateral type × EXP</i>  | 1.050***        | (0.019)    | 1.038*         | (0.020)    | 0.973          | (0.019)  | 1.072***       | (0.018)    |
| <i>Collateral type × ΔHPI</i> | 1.513***        | (0.195)    | 0.594***       | (0.057)    | 0.735***       | (0.081)  | 0.732***       | (0.077)    |
| <i>Collateral type × SMR</i>  | 1.005           | (0.006)    | 0.993          | (0.005)    | 1.005          | (0.005)  | 0.998          | (0.004)    |
| <i>Collateral type × SMV</i>  | 1.034**         | (0.015)    | 1.100***       | (0.013)    | 1.112***       | (0.013)  | 1.069***       | (0.014)    |
| <i>Loan repayment</i>         | Yes             |            | Yes            |            | Yes            |          | Yes            |            |
| <i>Loan purpose</i>           | Yes             |            | Yes            |            | Yes            |          | Yes            |            |
| <i>Observations</i>           | 8,098           |            | 8,645          |            | 9,160          |          | 11,952         |            |
| <i>Log-likelihood</i>         | -17,336         |            | -19,733        |            | -20,437        |          | -25,976        |            |

We report the hazard ratios (exponentiated coefficients), with values greater than 1 indicating that a higher value of the covariate increases the probability of the occurrence of the transaction. Note that this analysis is performed based on Equation (3). Standard errors are reported in parentheses. Significance level: \* $p < 0.10$ , \*\* $p < 0.05$ , \*\*\* $p < 0.01$ .

**Table A2. Sensitivity to Fundraising performance for Amount-to-invest Analysis**

| <i>Percent Funded</i>         | <=25%       |         | 25%~50%     |         | 50%~75%     |         | >75%        |         |
|-------------------------------|-------------|---------|-------------|---------|-------------|---------|-------------|---------|
|                               | (1)         |         | (2)         |         | (3)         |         | (4)         |         |
| <i>Collateral type</i> (1=MS) | -0.242      | (0.192) | -0.492**    | (0.244) | -0.215      | (0.168) | -0.076      | (0.185) |
| <i>log Loan amount</i>        | 0.313***    | (0.044) | 0.213***    | (0.070) | 0.328***    | (0.058) | 0.128***    | (0.045) |
| <i>log Loan rate</i>          | 4.103***    | (0.482) | 4.980***    | (0.771) | 3.309***    | (0.546) | 2.593***    | (0.440) |
| <i>log Loan duration</i>      | -0.120      | (0.079) | -0.211*     | (0.126) | 0.094       | (0.106) | 0.016       | (0.086) |
| <i>Age</i>                    | 0.001       | (0.002) | 0.005**     | (0.002) | 0.001       | (0.003) | -0.001      | (0.002) |
| <i>Gender</i>                 | -0.066      | (0.042) | -0.067      | (0.050) | -0.079**    | (0.036) | 0.044       | (0.044) |
| <i>Education</i>              | 0.082*      | (0.045) | 0.144***    | (0.056) | 0.197***    | (0.057) | 0.002       | (0.041) |
| <i>Marital status</i>         | 0.125***    | (0.037) | 0.051       | (0.051) | -0.019      | (0.053) | 0.023       | (0.049) |
| <i>Monthly income</i>         | 0.002       | (0.036) | -0.022      | (0.049) | -0.049      | (0.055) | 0.060       | (0.044) |
| <i>Employment</i>             | -0.273***   | (0.070) | -0.171*     | (0.092) | -0.209***   | (0.062) | -0.221***   | (0.058) |
| <i>Co-borrower</i>            | -0.154**    | (0.076) | -0.222**    | (0.092) | 0.139       | (0.090) | 0.011       | (0.073) |
| <i>Repeat borrower</i>        | -0.073      | (0.070) | 0.060       | (0.098) | 0.014       | (0.106) | -0.184*     | (0.100) |
| <i>Years of purchase</i>      | 0.020***    | (0.006) | -0.018**    | (0.009) | -0.003      | (0.010) | 0.004       | (0.008) |
| <i>log Gross area</i>         | 0.139**     | (0.055) | -0.005      | (0.070) | 0.150**     | (0.060) | 0.116**     | (0.053) |
| <i>log Estimated value</i>    | -0.094**    | (0.043) | 0.011       | (0.071) | -0.100      | (0.061) | 0.069       | (0.056) |
| <i>Percent funded</i>         | 25.185***   | (1.324) | 8.238**     | (3.374) | 13.579**    | (6.131) | -30.868***  | (8.061) |
| <i>Sq Percent funded</i>      | -73.403***  | (5.071) | -9.757**    | (4.403) | -11.447**   | (4.926) | 17.577***   | (4.499) |
| <i>EXP</i>                    | 0.175***    | (0.036) | 0.161***    | (0.036) | 0.124***    | (0.032) | 0.050**     | (0.025) |
| <i>ΔHPI</i>                   | 0.113       | (0.143) | 0.213       | (0.171) | 0.103       | (0.127) | 0.097       | (0.141) |
| <i>SMR</i>                    | 0.016***    | (0.005) | 0.005       | (0.006) | 0.001       | (0.005) | 0.005       | (0.005) |
| <i>SMV</i>                    | 0.032**     | (0.013) | 0.013       | (0.020) | -0.002      | (0.012) | 0.004       | (0.014) |
| <i>Collateral type × EXP</i>  | -0.043*     | (0.025) | -0.036      | (0.026) | -0.020      | (0.025) | 0.028       | (0.021) |
| <i>Collateral type × ΔHPI</i> | 0.242*      | (0.134) | 0.237       | (0.150) | 0.344***    | (0.131) | 0.096       | (0.121) |
| <i>Collateral type × SMR</i>  | 0.009       | (0.006) | 0.038***    | (0.008) | 0.012*      | (0.006) | 0.001       | (0.006) |
| <i>Collateral type × SMV</i>  | 0.019       | (0.015) | 0.039*      | (0.022) | 0.009       | (0.014) | -0.020      | (0.017) |
| <i>Intercept</i>              | -10.239***  | (1.332) | -11.582***  | (2.209) | -9.902***   | (2.691) | 9.961**     | (3.897) |
| <i>Loan repayment</i>         | Yes         |         | Yes         |         | Yes         |         | Yes         |         |
| <i>Loan purpose</i>           | Yes         |         | Yes         |         | Yes         |         | Yes         |         |
| Observations                  | 13,765      |         | 11,757      |         | 11,706      |         | 14,827      |         |
| Log-likelihood                | -23,843.979 |         | -21,743.198 |         | -21,296.019 |         | -26,650.757 |         |

Standard errors are reported in parentheses.\* $p < 0.10$ , \*\* $p < 0.05$ , \*\*\* $p < 0.01$ .

Table A2 and Table A3 report the sensitivity of our results to fundraising performance. From our data, we can only observe loans that are successfully (fully) funded because the platform conceals the loan listings that fail to reach the requested amount at the end of their lending period. In this subsection, we conduct an additional check to assess whether our findings are sensitive to the fundraising performance of loans. The rationale behind our sensitivity analysis is as follows. From a payoff externality standpoint, lenders may perceive loans with lower funding percentage *more likely to fail* and accordingly adjust their investment behavior, as compared to those with higher funding percentage, *ceteris paribus*. We divide the whole data set into four subsamples based on the percentage of the requested amount that has been reached prior to the occurrence of a given transaction (using *Percent funded* = 25%, 50%, and 75% as cutoff values). We then perform the analysis separately using the resulting subsamples. Despite few minor changes in the significance level, the results are largely consistent across subsamples, suggesting that lenders as a whole do not demonstrate a systematic behavioral change toward loans that are less desirable (i.e., seemingly more likely to fail).

**Table A3. Alternative Survival Distributions**

| Distribution | Log-likelihood     | AIC                | BIC                | Observations |
|--------------|--------------------|--------------------|--------------------|--------------|
| log-normal   | -212,617.399       | 425,282.798        | 425,487.794        | 37,855       |
| log-logistic | -212,878.323       | 425,804.646        | 426,009.642        | 37,855       |
| gamma        | -222,412.805       | 444,873.611        | 445,078.607        | 37,855       |
| exponential  | -275,079.836       | 550,205.673        | 550,402.127        | 37,855       |
| Weibull      | <b>-86,107.587</b> | <b>172,263.174</b> | <b>172,468.171</b> | 37,855       |

**Table A4. Alternative Competing Risks Analysis**

|                               | Hazard Ratio | Std. Err. |
|-------------------------------|--------------|-----------|
| <i>Collateral type (1=MS)</i> | 0.746***     | (0.030)   |
| <i>log Loan amount</i>        | 0.753***     | (0.010)   |
| <i>log Loan rate</i>          | 9.759***     | (1.063)   |
| <i>log Loan duration</i>      | 0.938**      | (0.025)   |
| <i>Age</i>                    | 1.006***     | (0.001)   |
| <i>Gender</i>                 | 0.975**      | (0.011)   |
| <i>Education</i>              | 1.258***     | (0.015)   |
| <i>Marital status</i>         | 0.968***     | (0.012)   |
| <i>Monthly income</i>         | 0.921***     | (0.011)   |
| <i>Employment</i>             | 0.900***     | (0.016)   |
| <i>Co-borrower</i>            | 1.108***     | (0.023)   |
| <i>Repeat borrower</i>        | 1.435***     | (0.031)   |
| <i>Years of purchase</i>      | 0.996**      | (0.002)   |
| <i>log Gross area</i>         | 1.018        | (0.015)   |
| <i>log Estimated value</i>    | 0.979        | (0.014)   |
| <i>Percent funded</i>         | 0.094***     | (0.007)   |
| <i>Sq Percent funded</i>      | 3.359***     | (0.219)   |
| <i>EXP</i>                    | 1.058***     | (0.004)   |
| <i>ΔHPI</i>                   | 1.888***     | (0.048)   |
| <i>SMR</i>                    | 1.014***     | (0.001)   |
| <i>SMV</i>                    | 0.981***     | (0.003)   |
| <i>Collateral type × EXP</i>  | 1.004        | (0.006)   |
| <i>Collateral type × ΔHPI</i> | 0.921**      | (0.033)   |
| <i>Collateral type × SMR</i>  | 0.999        | (0.002)   |
| <i>Collateral type × SMV</i>  | 1.032***     | (0.004)   |
| <i>Loan repayment</i>         | Yes          |           |
| <i>Loan purpose</i>           | Yes          |           |
| Observations                  | 75,710       |           |
| Log-likelihood                | -357,118.557 |           |

In addition to fitting separate regression models for each transaction type, we perform a single analysis of the two types of transactions at the same time and report results in Table A4. Note that the number of observations increased since the analysis is performed based on an expanded dataset wherein each transaction is represented twice, one for each transaction type. We report the hazard ratios (exponentiated coefficients), with values greater than 1 indicating that a higher value of the covariate increases the probability of the occurrence of the transaction. Standard errors are reported in parentheses. Significance level: \* $p < 0.10$ , \*\* $p < 0.05$ , \*\*\* $p < 0.01$ .
